# Supplementary material for: RBP4-STRA6 Pathway Drives Cancer Stem Cell Maintenance and Mediates High-Fat Diet-Induced Colon Carcinogenesis
Source: PubMed Central journal article supplement (PMC5549806; doi:10.1016/j.stemcr.2017.06.002), 2017-07-06
Supplement: mmc1.pdf [file mmc1.pdf]

**Stem Cell Reports, Volume 9**

**Supplemental Information**

**RBP4-STRA6 Pathway Drives Cancer Stem Cell Maintenance and Mediates High-Fat Diet-Induced Colon Carcinogenesis**

**Sheelarani Karunanithi, Liraz Levi, Jennifer DeVecchio, George Karagkounis, Ofer Reizes, Justin D. Lathia, Matthew F. Kalady, and Noa Noy**

**Fig S1**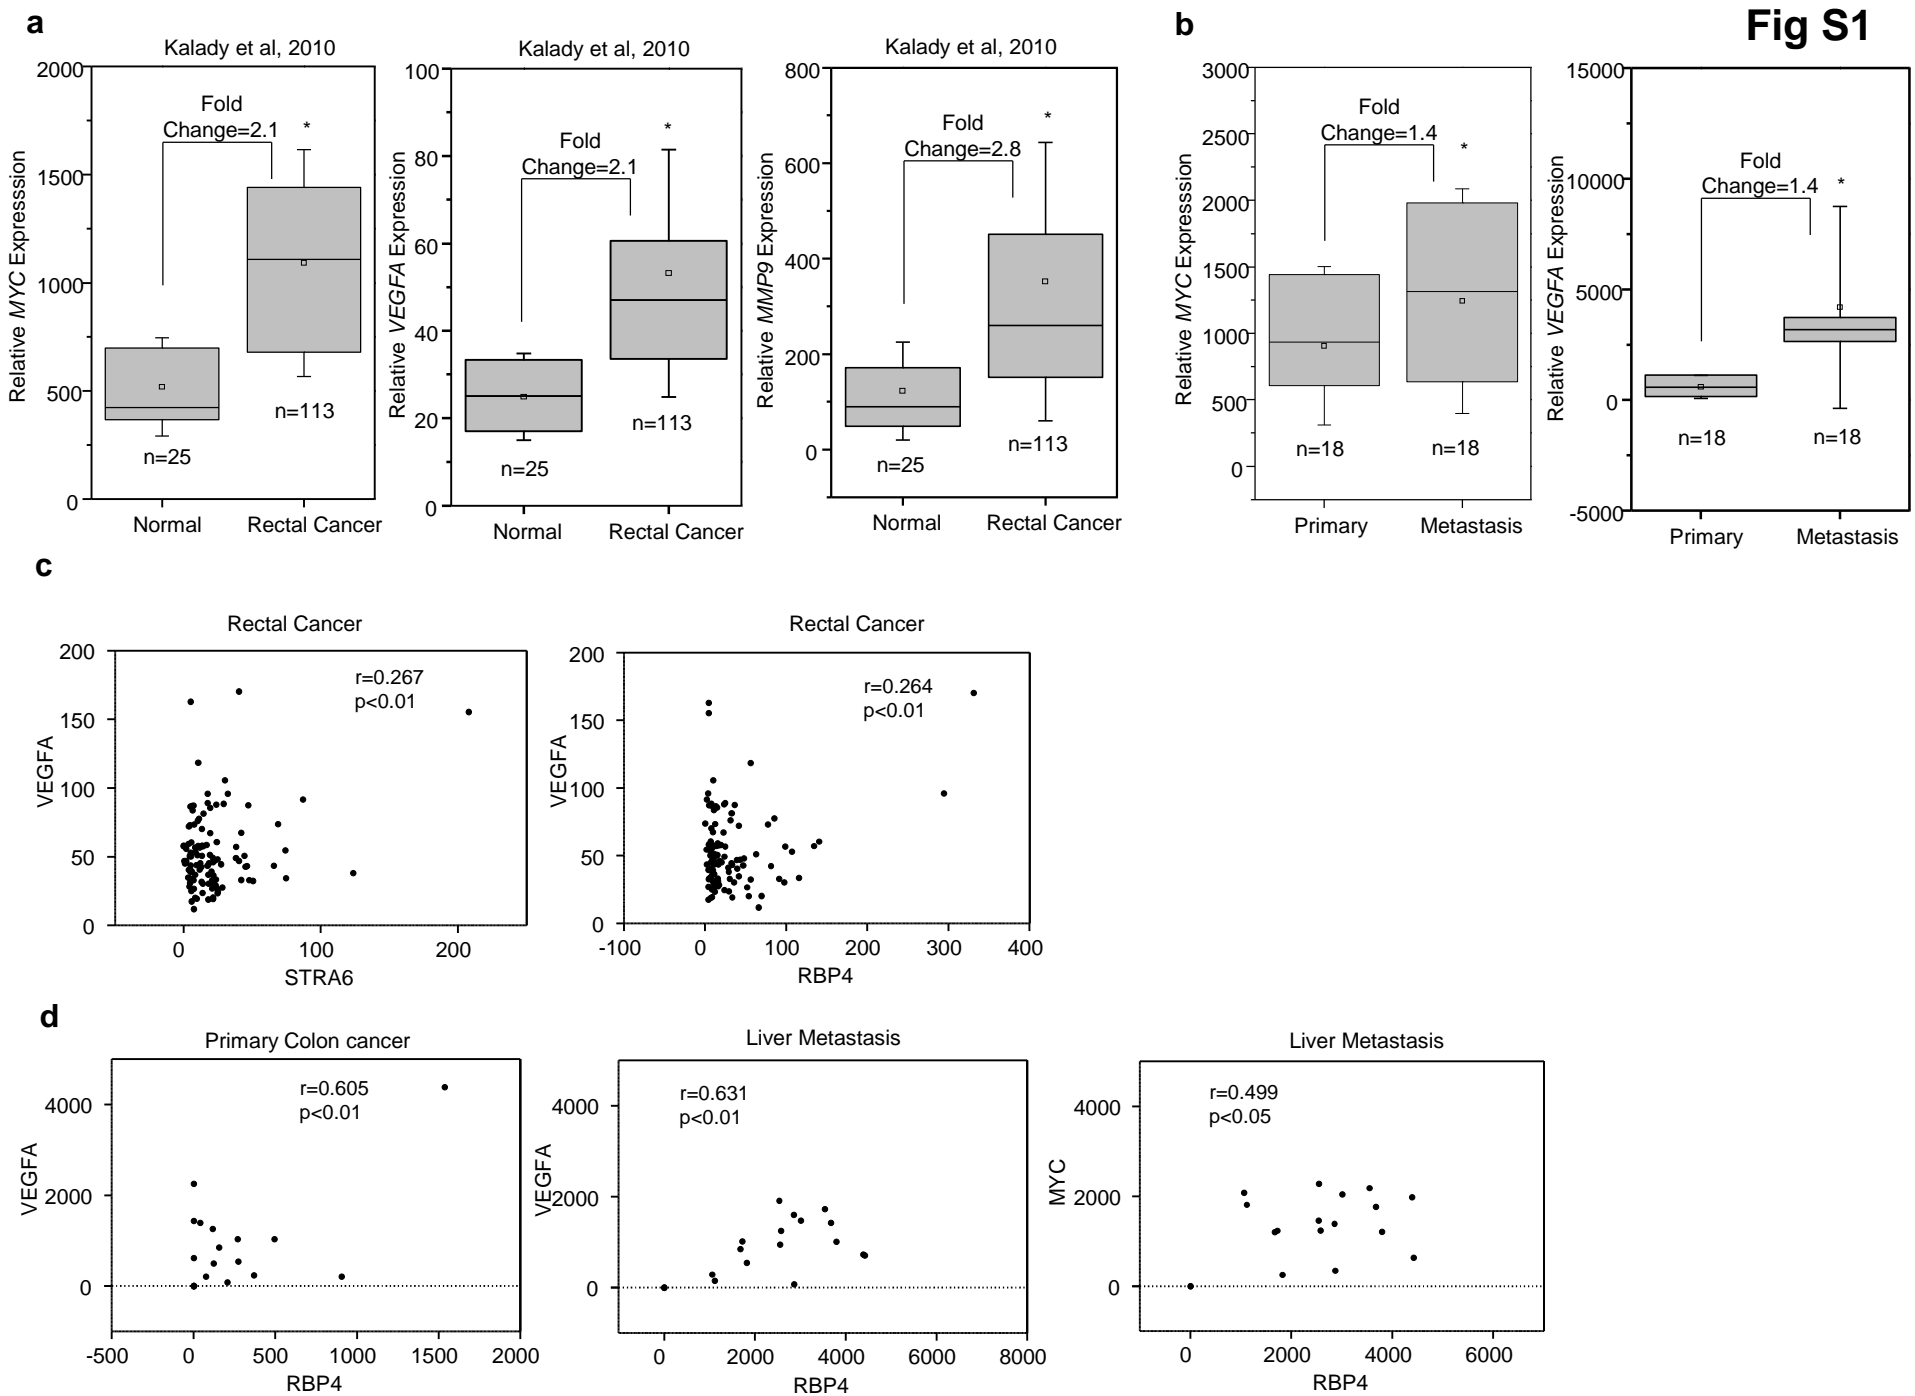

**a**

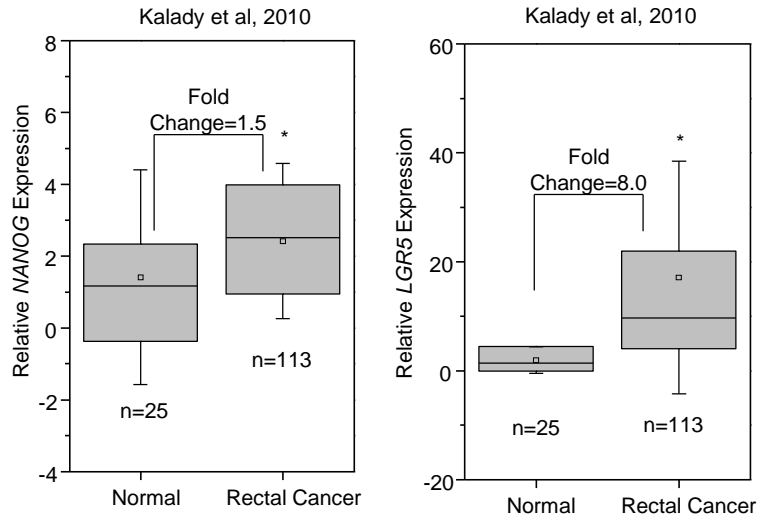

**b**

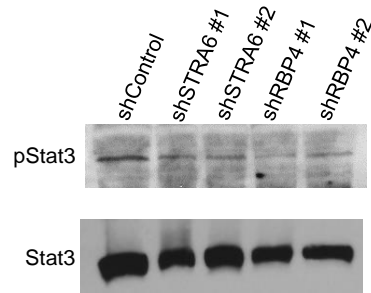

**c**

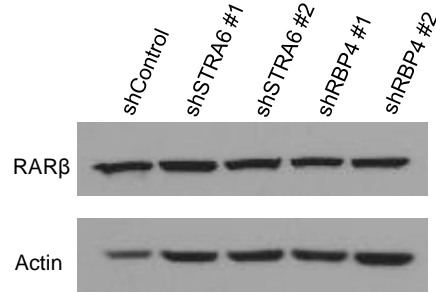

**d**

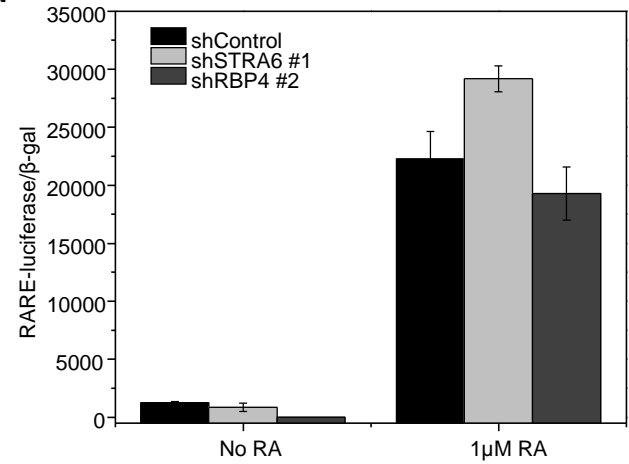

**a**

| SW480      | Number of spheres positive wells/<br>Number of wells |       |       |       |
|------------|------------------------------------------------------|-------|-------|-------|
|            | Number of cells per well                             |       |       |       |
|            | 1                                                    | 2     | 5     | 10    |
| shControl  | 8/24                                                 | 13/24 | 21/24 | 24/24 |
| shSTRA6 #1 | 3/24                                                 | 4/24  | 12/24 | 16/24 |
| shSTRA6 #2 | 3/24                                                 | 5/24  | 14/24 | 19/24 |
| shRBP4 #1  | 2/24                                                 | 4/24  | 6/24  | 13/24 |
| shRBP4 #2  | 4/24                                                 | 7/24  | 9/24  | 12/24 |

**b**

| SW480      | Number of tumors<br>/ Number of injected mice |                     |                   |
|------------|-----------------------------------------------|---------------------|-------------------|
|            | Number of cells per injection                 |                     |                   |
|            | 2.5*10 <sup>5</sup>                           | 1.5*10 <sup>4</sup> | 1*10 <sup>4</sup> |
| shControl  | 4/5                                           | 2/5                 | 1/5               |
| shSTRA6 #1 | 2/5                                           | 0/5                 | 0/5               |
| shRBP4 #1  | 5/5                                           | 2/5                 | 0/6               |

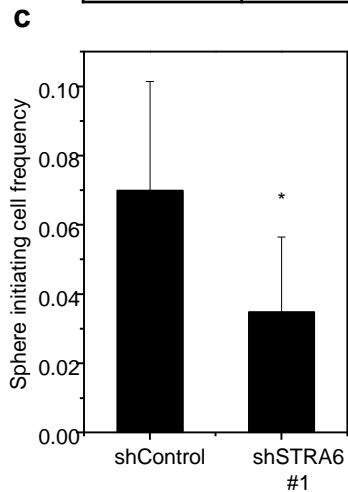

| SW480      | Number of spheres positive wells/<br>Number of wells |      |       |      |      | Sphere initiating-cell<br>frequency |                            | Fold<br>Change | p<br>value |
|------------|------------------------------------------------------|------|-------|------|------|-------------------------------------|----------------------------|----------------|------------|
|            | Number of cells per well                             |      |       |      |      | Estimate                            | 95% Confidence<br>Interval |                |            |
|            | 1                                                    | 2    | 5     | 10   | 20   |                                     |                            |                |            |
| shControl  | 3/24                                                 | 4/24 | 10/24 | 4/12 | 8/12 | 1/14.3                              | (1/9.86-1/20.7)            |                |            |
| shSTRA6 #1 | 1/24                                                 | 2/24 | 2/24  | 5/12 | 6/12 | 1/28.7                              | (1/17.7-1/46.7)            | 2              | p<0.05     |

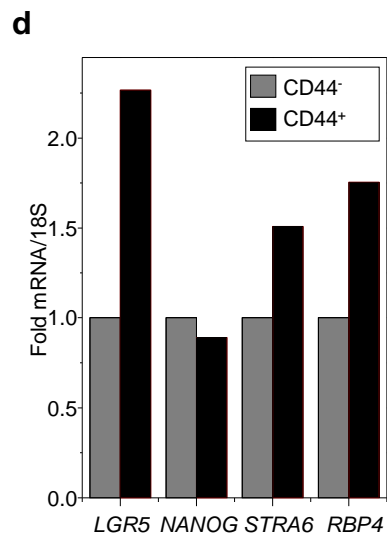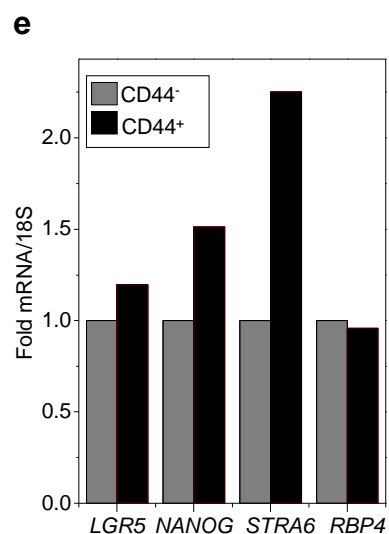

**a**

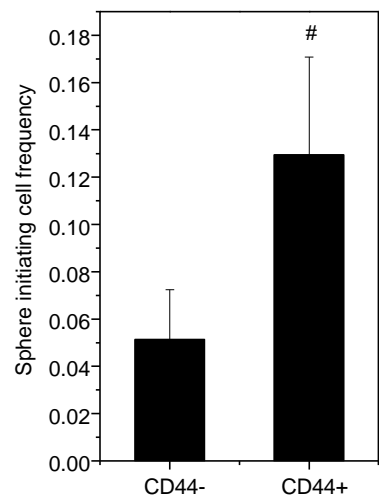

**b**

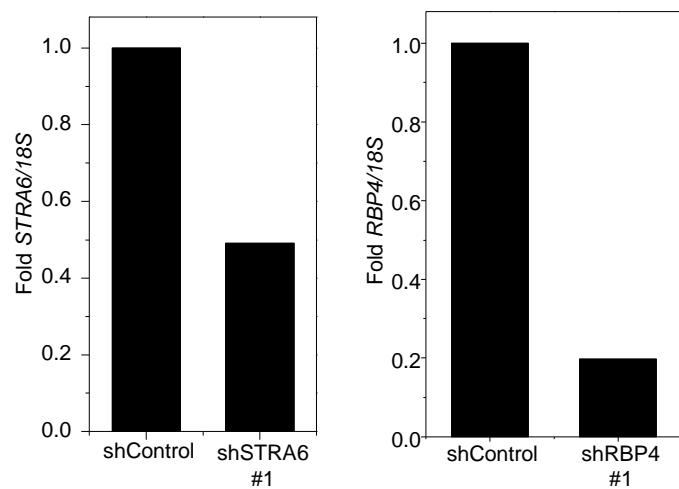

**c**

| PDX656     | Number of spheres positive wells/<br>Number of wells |       |       |       |
|------------|------------------------------------------------------|-------|-------|-------|
|            | Number of cells per well                             |       |       |       |
|            | 1                                                    | 5     | 10    | 20    |
| shControl  | 7/24                                                 | 13/24 | 22/24 | 24/24 |
| shSTRA6 #1 | 3/24                                                 | 10/24 | 14/24 | 20/24 |
| shControl  | 7/24                                                 | 14/24 | 19/24 | 21/24 |
| shRBP4 #1  | 3/24                                                 | 7/24  | 12/24 | 18/24 |

**Fig S5**

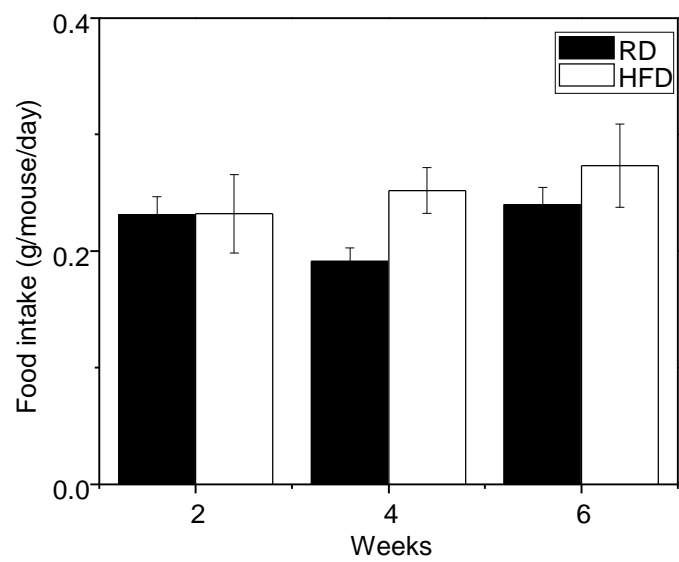

**Supplemental Figure legends:**

**Figure S1: Related to Figure 1. JAK-STAT target gene expression correlate to RBP4-STRA6 pathway.** a) Levels of STAT target genes, MYC, VEGFA and MMP9 in rectal cancer patients compared to normal tissue. \*  $p < 0.01$  b) Analysis of expression levels of MYC and VEGFA in matched primary and metastatic colon cancer samples. \*  $p < 0.05$  c) Correlation between expression levels of VEGFA and STRA6 or RBP4 in rectal cancer patients. Inset shows Pearson coefficient 'r' and p value. d) Correlation between expression levels of VEGFA and RBP4 in primary colon cancer and between VEGFA or MYC and RBP4 in matched liver metastasis patients are presented with Pearson coefficient 'r'.

**Figure S2: Related to Figures 1 & 2. RBP4-STRA6 pathway is related to colon cancer stemness.** a) NANOG and LGR5 expression is upregulated in rectal cancer patients. \*  $p < 0.01$ . b) Immunoblots showing phospho-STAT3 and total STAT3 levels in SW480 cells stably knockdown for STRA6 or RBP4. c) Immunoblot showing unchanged protein levels of retinoic acid (RA) target gene, RAR $\beta$  in SW480 cells stably expressing control, STRA6 or RBP4 shRNAs. Actin is used as a loading control. d) Activation of RAR $\alpha$  in response to treatment with 1 $\mu$ M retinoic acid in SW480 stable lines was measured using transactivation assays. Cells were transfected with RAR-response element luciferase, RAR $\alpha$  and  $\beta$ -gal constructs before treatments. Luciferase activity in response to treatment was normalized to  $\beta$ -galactosidase levels. Data are mean $\pm$ SE of 3 biological replicates.  $p < 0.05$  (comparisons are between untreated and treated samples).

**Figure S3: Related to Figure 4. Knockdown of STRA6 or RBP4 decrease CSC frequency.** a) Limiting dilution assay in indicated SW480 lines shown in Fig 4B. Dose of cells seeded and the resulting frequency of sphere formation are tabulated. b) Tumor initiating cell frequency at indicated doses of SW480 cell injections from *in vivo* limiting dilution assay in Fig 4C. Frequency of tumor formation at respective dose of cells are shown in the table. c) *In vitro* limiting dilution assay of cells dissociated from SW480 tumors in Fig 4C expressing control or STRA6 shRNAs. Frequency estimates were calculated from 24 biological replicates of varying cell doses. Sphere re-initiation frequency calculated using ELDA software is plotted with error bars representing 95% confidence interval. \*  $p < 0.05$ . Stem cell frequency estimates within confidence intervals are shown in the table. d) Tumors from SW480 shControl injections were dissociated, stained with CD44-FITC antibody and sorted on BD FACS ARIA II. RNA levels of *STRA6*, *RBP4*, *NANOG* and *LGR5* in CD44 negative and positive populations are shown. Each bar represents expression analysis of cells dissociated after pooling several tumors from mice (n=5). e) Expression levels of *STRA6*, *RBP4*, *NANOG* and *LGR5* in CD44 negative and positive populations of PDX656 maintained as non-adherent spheres in culture.

**Figure S4: Related to Figures 5. Knockdown efficiencies in a PDX.** a) Sphere-initiating cell frequency of CD44 negative and positive cells sorted from cultured PDX 656 cells. Frequency estimates were calculated from 24 biological replicates of varying cell doses. Graph represents the fraction of sphere-forming stem cells and error bars represent 95% confidence intervals. #  $p < 0.01$ . b) Knockdown efficiency of STRA6 (left) and RBP4 (right) shRNA in PDX 656 shown by differences in mRNA levels. c) Table shows dose of cells and frequency of sphere formation in a limiting dilution assay in PDX 656 performed in Fig 5A.

**Figure S5: Related to Figures 6. Food intake is unaffected by diet.** Food intake in mice fed a regular or high-fat diet in Fig 6A. Amount of food consumed normalized to body weights is shown during 2, 4 and 6 weeks after the mice were placed on the dietary regimen. n= 5 mice.
